# Supplementary material for: WGSQuikr: Fast Whole-Genome Shotgun Metagenomic Classification
Source: PubMed Central journal article supplement (PMC3953531; doi:10.1371/journal.pone.0091784), 2014-03-13
Supplement: pone.0091784.s001.pdf [file pone.0091784.s001.pdf]

## SECTION S1: DESIGN OF GRINDER EXPERIMENTS

We detail here the production of the simulated data produced by the shotgun/amplicon read simulator Grinder [1]. These datasets were designed to mimic reads generated by a variety of Illumina platforms, and hence we set the read-length distributions to be normally distributed with a variety of means which are summarized in table S1. An equal number of datasets were generated consisting of the following

**Table S1: Grinder experiment read lengths.**

| Mean<br>(bp) | Standard<br>Deviation (bp) | Number of<br>Experiments |
|--------------|----------------------------|--------------------------|
| 35           | 0                          | 96                       |
| 50           | 0                          | 96                       |
| 100          | 0                          | 96                       |
| 150          | 5                          | 96                       |
| 250          | 20                         | 96                       |
| 300          | 25                         | 96                       |
| 450          | 50                         | 96                       |
| 800          | 100                        | 96                       |

number of reads: 10K, 100K, 1M, 5M. Three different diversity values were chosen to be 10, 20, and 50 with abundances modeled by using the following four distributions: linear, uniform, power-law with parameter 0.750 and exponential with parameter 1. Homopolymers of length  $n$  were generated by a normal distribution with mean  $n$  and variance  $0.15 * \sqrt{n}$  as in [2]. Sequencing errors were designed to model Illumina errors and used the 4<sup>th</sup> degree polynomial in [3] with 80% of these errors set to be substitutions, while the remaining 20% set to be indels. Reference sequences were sampled proportionally to their length to mimic the length bias seen in WGS datasets.

## SECTION S2: QUIKR METHOD TECHNICAL DETAILS

**Mathematical Formulation.** Given the alphabet  $\mathcal{A} = \{A, C, T, G\}$ , let  $\mathcal{A}^n$  denote the set of all words  $v$  of length  $|v| = n$  on  $\mathcal{A}$ , and let  $\mathcal{A}^* = \bigcup_{n \geq 0} \mathcal{A}^n$  be the set of all finite words on  $\mathcal{A}$ . Hence words containing non-*ACTG* characters are ignored. Let  $D = \{d_1, \dots, d_M\}$  be a database of genomic sequences  $d_j \in \mathcal{A}^*$  and let  $S = \{s_1, \dots, s_t\}$  be a set of sample sequences (the reads to be classified). Fix a  $k$ -mer size and endow  $\mathcal{A}^k = \{v_1, \dots, v_{4^k}\}$  with the lexicographic order. Let  $\text{occ}_v(w)$  represent the number of occurrences (with overlap) of the subword  $v$  in the word  $w$ . That is, for  $w, v \in \mathcal{A}^n$ , let

$$(A.1) \quad \text{occ}_v(w) = |\{j : w_j w_{j+1} \cdots w_{j+|v|-1} = v\}|.$$

For  $j = 1, \dots, M$  and  $i = 1, \dots, 4^k$ , define the  $k$ -mer training matrix entrywise as

$$(A.2) \quad A_{i,j}^{(k)} = \frac{\text{occ}_{v_i}(d_j)}{|d_j| - k + 1}.$$

The matrix  $A^{(k)}$  satisfies  $A_{i,j}^{(k)} \geq 0$  and is column-normalized, i.e.

$$(A.3) \quad \sum_{i=1}^{4^k} A_{i,j}^{(k)} = 1 \quad \text{for all } j = 1, \dots, M.$$

Define the *sample  $k$ -mer frequency vector* entrywise for  $i = 1, \dots, 4^k$  as

$$(A.4) \quad s_i^{(k)} = \frac{\sum_{j=1}^t \text{occ}_{v_i}(s_j)}{\sum_{l=1}^{4^k} \sum_{j=1}^t \text{occ}_{v_l}(s_j)}.$$

We assume even coverage of each genome. That is, we assume that the composition of the bacterial community is represented by a probability vector  $x \in \mathbb{R}^M$  satisfying the following: given a database sequence  $d \in D$ , the set of reads  $\{s_1^d, \dots, s_{t_d}^d\} \subset S$  coming from this sequence, and  $x_d$  the concentration in the sample of the bacteria corresponding to sequence  $d$ , for each  $i$  the following holds:

$$(A.5) \quad \frac{\sum_{j=1}^{t_d} \text{occ}_{v_i}(s_j^d)}{\sum_{l=1}^{4^k} \sum_{j=1}^{t_d} \text{occ}_{v_l}(s_j^d)} = x_d \times \frac{\text{occ}_{v_i}(d)}{\sum_{l=1}^{4^k} \text{occ}_{v_l}(d)}.$$

This means that the total  $k$ -mer count of all the read fragments corresponding to the sequence  $d$  is proportional to the  $k$ -mer count of the sequence  $d$  itself, with the proportionality constant being equal to the concentration of the sequence  $d$  in the sample  $S$ . Our assumptions imply that

$$(A.6) \quad A^{(k)}x = s^{(k)}.$$

We will try to recover the probability vector  $x$  satisfying  $x_j \geq 0$  for all  $j = 1, \dots, M$  and  $\sum_{j=1}^M x_j = 1$  from information in the form of equation (A.6).

**Nonnegative Basis Pursuit Denoising.** Given that a bacterial community is typically distributed as a sparse vector  $x$  (a small percentage of all extant bacteria are actually present in a given sample), we pursue sparsity-promoting minimizations involving the  $\ell_1$ -norm. Basis Pursuit [4], called (BP) below, is one of the most popular methods. In our situation, it is natural to include the nonnegativity constraint, leading to (BP) $_{\geq 0}$ . We further modify the optimization by relaxing the equality constraint to arrive at the regularized problem (REG $_1^2$ ). Thus, the three optimization problems considered are:

$$\begin{aligned} (\text{BP}) \quad & \underset{z \in \mathbb{R}^M}{\text{minimize}} \quad \|z\|_1 && \text{subject to } A^{(k)}z = s^{(k)}, \\ (\text{BP}_{\geq 0}) \quad & \underset{z \in \mathbb{R}^M}{\text{minimize}} \quad \|z\|_1 && \text{subject to } A^{(k)}z = s^{(k)} \text{ and } z \geq 0, \\ (\text{REG}_1^2) \quad & \underset{z \in \mathbb{R}^M}{\text{minimize}} \quad \|z\|_1^2 + \lambda^2 \|A^{(k)}z - s^{(k)}\|_2^2 && \text{subject to } z \geq 0, \end{aligned}$$

It can be demonstrated, thanks to (A.3), that (BP) and (BP) $_{\geq 0}$  are equivalent in the sense that  $x$  is a solution of (BP) if and only if it is a solution of (BP) $_{\geq 0}$ , and that the latter is approached by solutions of (REG $_1^2$ ) when  $\lambda \rightarrow \infty$ , see [4].

We shall solve (REG $_1^2$ ) since it has the notable advantage of being transformed into a nonnegative least squares problem. Indeed, with

$$(A.7) \quad \tilde{A}^{(k)} := \left[ \frac{1 \cdots 1}{\lambda A^{(k)}} \right], \quad \tilde{s}^{(k)} := \left[ \frac{0}{\lambda s^{(k)}} \right],$$

the minimization (REG $_1^2$ ) is equivalent to

$$(\text{NNLSQ}) \quad \underset{z \in \mathbb{R}^M}{\text{minimize}} \quad \|\tilde{A}^{(k)}z - \tilde{s}^{(k)}\|_2^2 \quad \text{subject to } z \geq 0.$$

**Algorithmic Implementation.** To solve (NNLSQ) we utilized MATLAB's [5] implementation of `lsqnonneg()` which in turn is an implementation of the iterative Lawson-Hanson algorithm described in [6]. To calculate the matrices  $A^{(k)}$  and the vector  $s^{(k)}$  we used a custom SML [7] subword counting program written by Christopher Cramer and compiled for Linux using MLton [8].

**Selection of  $\lambda$ .** Parameter tuning is a common issue to be addressed when using regularized optimization procedures to solve linear inverse problems [9–11]. Two common methods include Generalized Cross Validation [12] and the L-Curve method [13]. The adaptive method by which we select the  $\lambda$  used in (A.7) is similar in spirit to the L-Curve method. In every case, it was observed that as a function of  $\lambda$ , the number of iterates necessary to solve (NNLSQ) via the Lawson-Hanson algorithm was linear, then exponential, then non-increasing. Figure S1 demonstrates this phenomenon for a sample dataset by plotting the number of iterates as a function of  $\lambda$ . Let  $its(\lambda)$  be the number of iterates needed to

solve (NNLSQ) via the Lawson-Hanson algorithm. It was also observed that  $x$  was most accurately reconstructed at the  $\lambda$  for which the number of iterations experienced its greatest increase. Figure S2 demonstrates this fact for an example dataset by plotting the  $\ell_1$ -error as well as  $\frac{d}{d\lambda}its(\lambda)$  as a function of  $\lambda$ , where  $\frac{d}{d\lambda}its(\lambda)$  denotes the first differences of  $its(\lambda)$ .

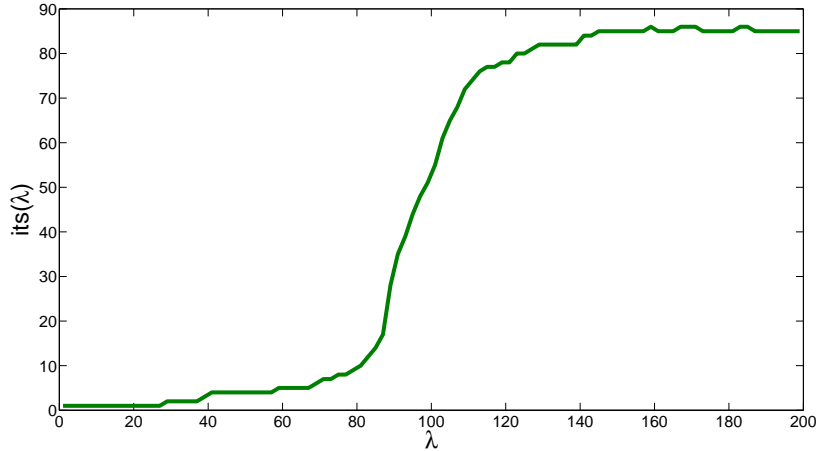

Figure S1: Number of iterates to solve (NNLSQ) as a function of  $\lambda$ .

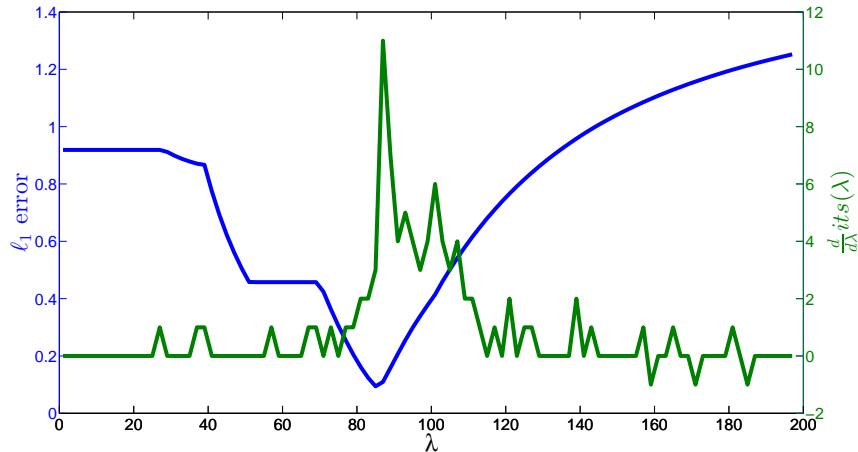

Figure S2:  $\ell_1$ -error and first difference of number of iterates needed to solve (NNLSQ) as functions of  $\lambda$ .

With this information in hand, the following adaptive approach was used to choose  $\lambda$ . First, let  $\frac{d}{d\lambda}its(\lambda_{t_0:I:t_1})$  designate the first differences of  $its(\lambda)$  when  $\lambda$  ranges from  $t_0$  to  $t_1$  in increments of  $I$ . We allowed  $\lambda$  to increase in increments of 100 from  $\lambda = 1$  until a smoothing spline approximation of  $\frac{d}{d\lambda}its(\lambda_{1:100:t_1})$  was shown to be negative for some  $t_1$ . A smoothing spline approximation was utilized because  $\frac{d}{d\lambda}its(\lambda_{t_0:I:t_1})$  is noisy when increasing  $\lambda$  in such large increments. Next, the maximum of  $\frac{d}{d\lambda}its(\lambda_{1:100:t_1})$  with respect to  $\lambda$  was identified, call it  $\lambda = t_M$ . Then the maximizer of

$\frac{d}{d\lambda} its(\lambda_{t_M-100:10:t_M+100})$  was used as the value of  $\lambda$  to solve (NNLSQ). Clearly this method can be refined further by taking smaller and smaller increments surrounding the maximizer of  $\frac{d}{d\lambda} its(\lambda)$ , but we found this two-step approach to provide sufficient speed and accuracy improvements over current methods.

#### REFERENCES

1. Angly FE, Willner D, Rohwer F, Hugenholtz P, Tyson GW (2012) Grinder: a versatile amplicon and shotgun sequence simulator. *Nucleic acids research* 61: 1–8.
2. Richter DC, Ott F, Auch AF, Schmid R, Huson DH (2008) MetaSim: a sequencing simulator for genomics and metagenomics. *PloS ONE* 3: e3373.
3. Korbel JO, Abyzov A, Mu XJ, Carriero N, Cayting P, et al. (2009) PEMer: a computational framework with simulation-based error models for inferring genomic structural variants from massive paired-end sequencing data. *Genome biology* 10: R23.
4. Foucart S, Koslicki D (2013) Sparse Recovery by means of Nonnegative Least Squares. *IEEE Signal Processing Letters*, In Print .
5. MATLAB 2012b, The MathWorks, Inc., Natick, MA, USA.
6. Lawson C, Hanson R (1974) *Solving Least Squares Problems*. Prentice-Hall, 350 pp.
7. Milner R, Tofte M, Harper R (1997) *The Definition of Standard ML*. Cambridge, MA: MIT press, 128 pp.
8. Weeks S (2006) Whole-program compilation in MLton. In: *Proceedings of the 2006 workshop on ML*. New York, NY.: ACM, p. 1.
9. Vogel C (2002) *Computational Methods for Inverse Problems*. Philadelphia, PA: SIAM, 183 pp.
10. Bertero M, Boccacci P (1998) *Introduction to Inverse Problems in Imaging*. London: Institute of Physics Publishing, 352 pp.
11. Daubechies I, Defrise M, De Mol C (2004) An iterative thresholding algorithm for linear inverse problems with a sparsity constraint. *Comm Pure Appl Math* 57: 1413–1457.
12. Golub G, Heath M, Wahba G (1979) Generalized cross-validation as a method for choosing a good ridge parameter. *Technometrics* 21: 215–223.
13. Hansen P, O’Leary D (1993) The use of the L-curve in the regularization of discrete ill-posed problems. *SIAM J Sci Comput* 14: 1487–1503.
